# Supplementary material for: Climate and air quality impacts due to mitigation of non-methane near-term climate forcers
Source: Copernicus journal article supplement (doi:10.5194/acp-2019-1209), 2020-02-04
Supplement: Supplementary file 1 [file acp-2019-1209-supplement.pdf]

# Supplementary Figures

“Climate and air quality impacts due to mitigation of non-methane near-term climate forcers” by Allen et al.

## Contents of this file:

1. Figures S1 to S6

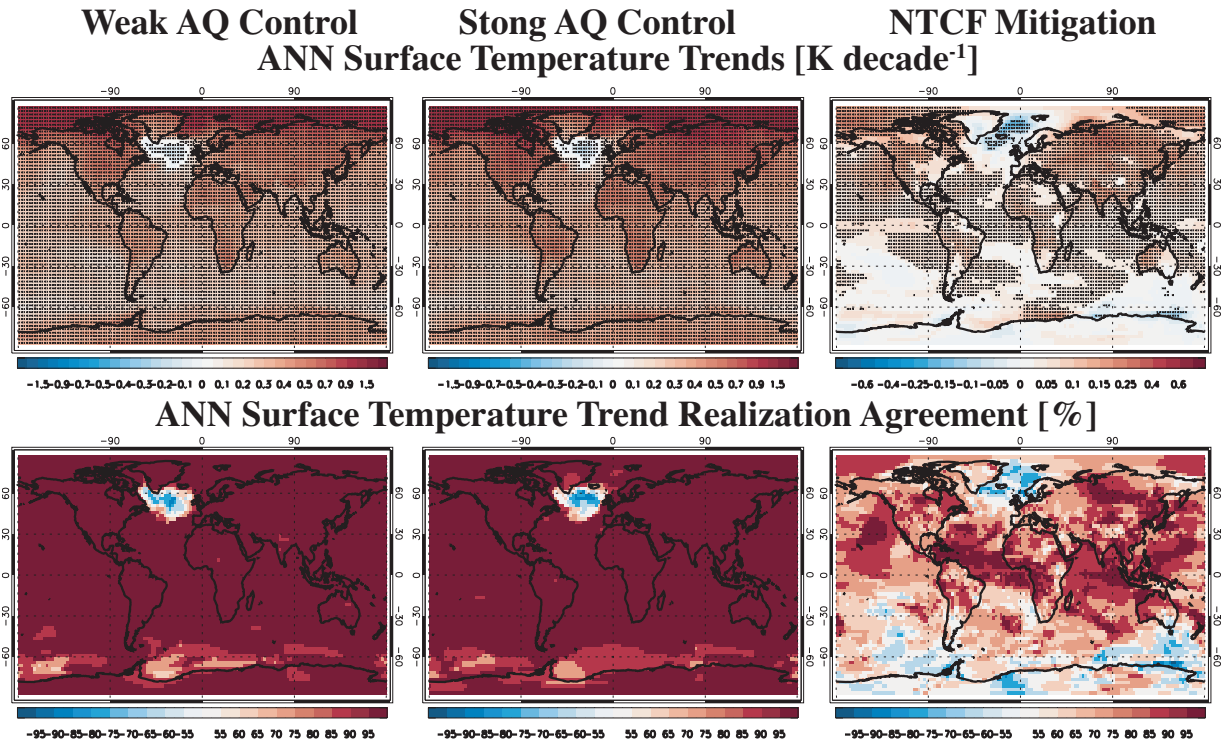

SUPPLEMENTARY FIGURE 1 **2015-2055 annual mean surface temperature trends and model trend realization agreement.** Surface temperature (top panels) trends [K decade<sup>-1</sup>] and (bottom panels) model trend realization agreement [%] for (left panels) weak air quality control (SSP3-7.0); (middle panels) strong air quality control (SSP3-7.0-lowNTCF) and (right panels) NTCF mitigation (SSP3-7.0-lowNTCF-SSP3-7.0). Stippling denotes trend significance at the 95% confidence level based on a standard *t*-test. Trend realization agreement represents the percentage of models that agree on the sign of the trend.

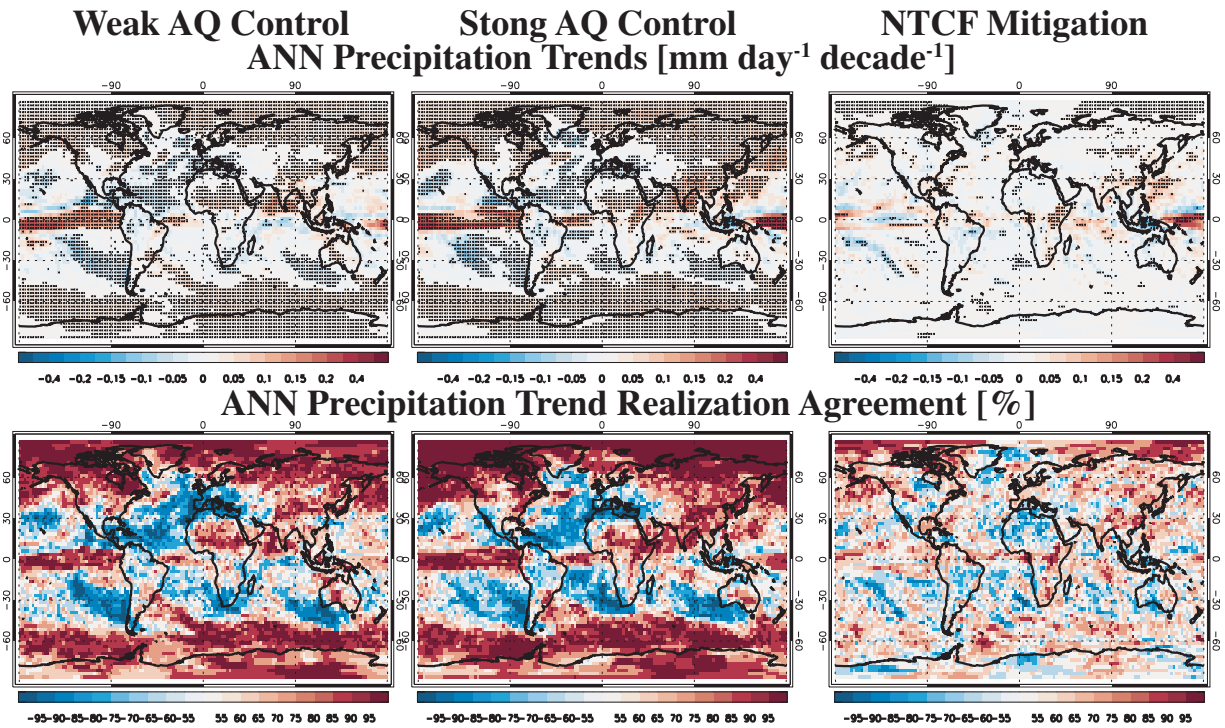

SUPPLEMENTARY FIGURE 2 **2015-2055 annual mean precipitation trends and model trend realization agreement.** Precipitation (top panels) trends [mm day<sup>-1</sup> decade<sup>-1</sup>] and (bottom panels) model trend realization agreement [%] for (left panels) weak air quality control (SSP3-7.0); (middle panels) strong air quality control (SSP3-7.0-lowNTCF) and (right panels) NTCF mitigation (SSP3-7.0-lowNTCF-SSP3-7.0). Stippling denotes trend significance at the 95% confidence level based on a standard *t*-test. Trend realization agreement represents the percentage of models that agree on the sign of the trend.

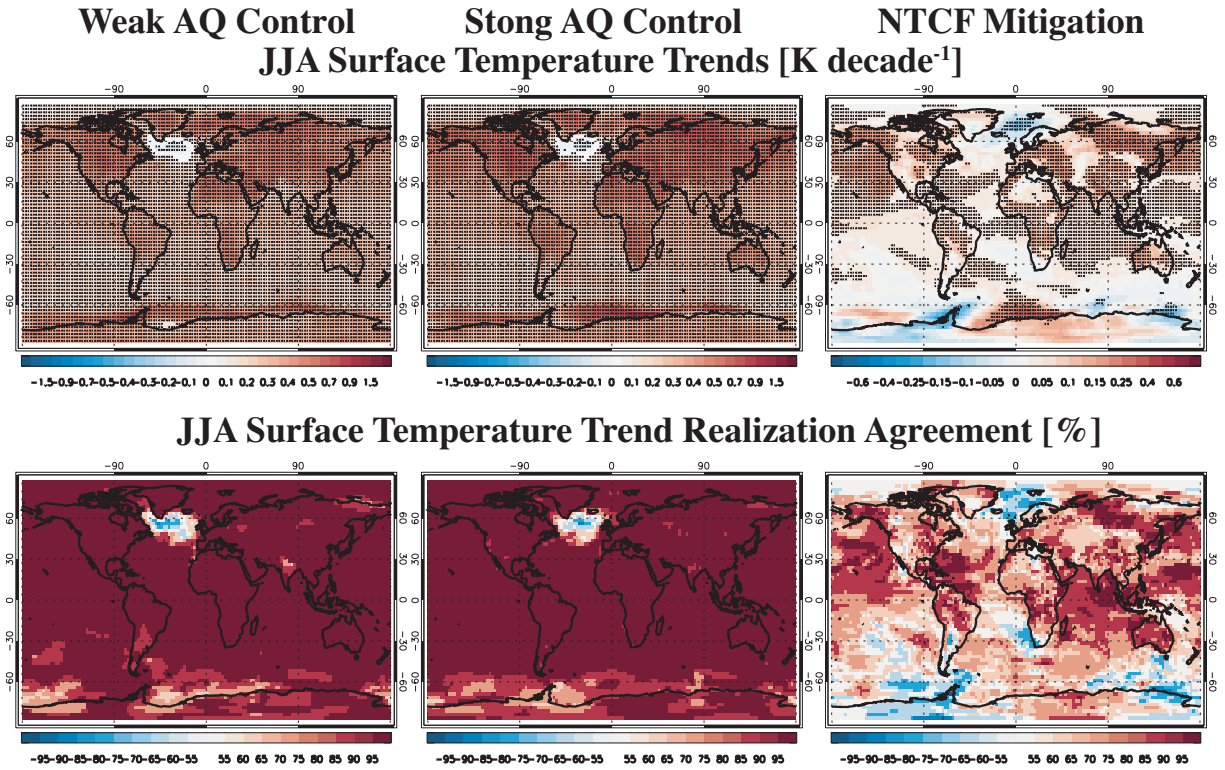

SUPPLEMENTARY FIGURE 3 2015-2055 June-July-August (JJA) mean surface temperature trends and model trend realization agreement. Surface temperature (top panels) trends [K decade<sup>-1</sup>] and (bottom panels) model trend realization agreement [%] for (left panels) weak air quality control (SSP3-7.0); (middle panels) strong air quality control (SSP3-7.0-lowNTCF) and (right panels) NTCF mitigation (SSP3-7.0-lowNTCF-SSP3-7.0). Stippling denotes trend significance at the 95% confidence level based on a standard *t*-test. Trend realization agreement represents the percentage of models that agree on the sign of the trend.

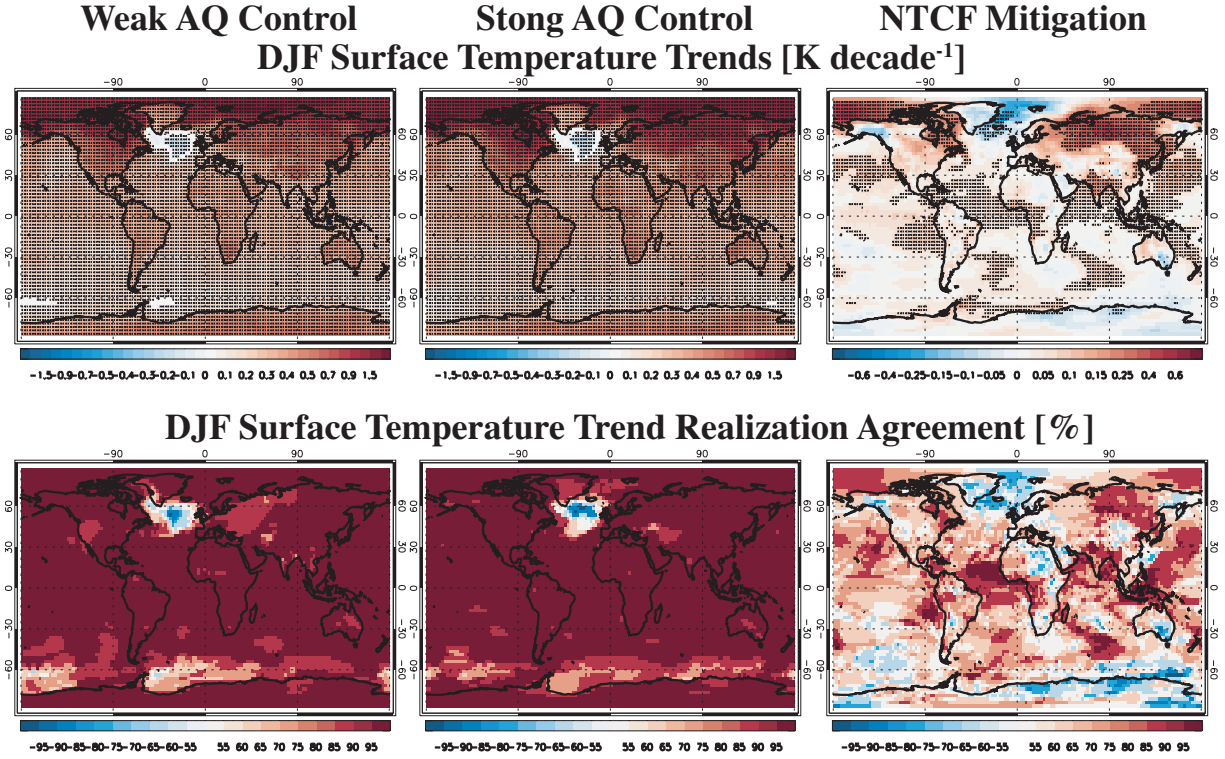

SUPPLEMENTARY FIGURE 4 2015-2055 December-January-February (DJF) mean surface temperature trends and model trend realization agreement. Surface temperature (top panels) trends [K decade<sup>-1</sup>] and (bottom panels) model trend realization agreement [%] for (left panels) weak air quality control (SSP3-7.0); (middle panels) strong air quality control (SSP3-7.0-lowNTCF) and (right panels) NTCF mitigation (SSP3-7.0-lowNTCF-SSP3-7.0). Stippling denotes trend significance at the 95% confidence level based on a standard *t*-test. Trend realization agreement represents the percentage of models that agree on the sign of the trend.



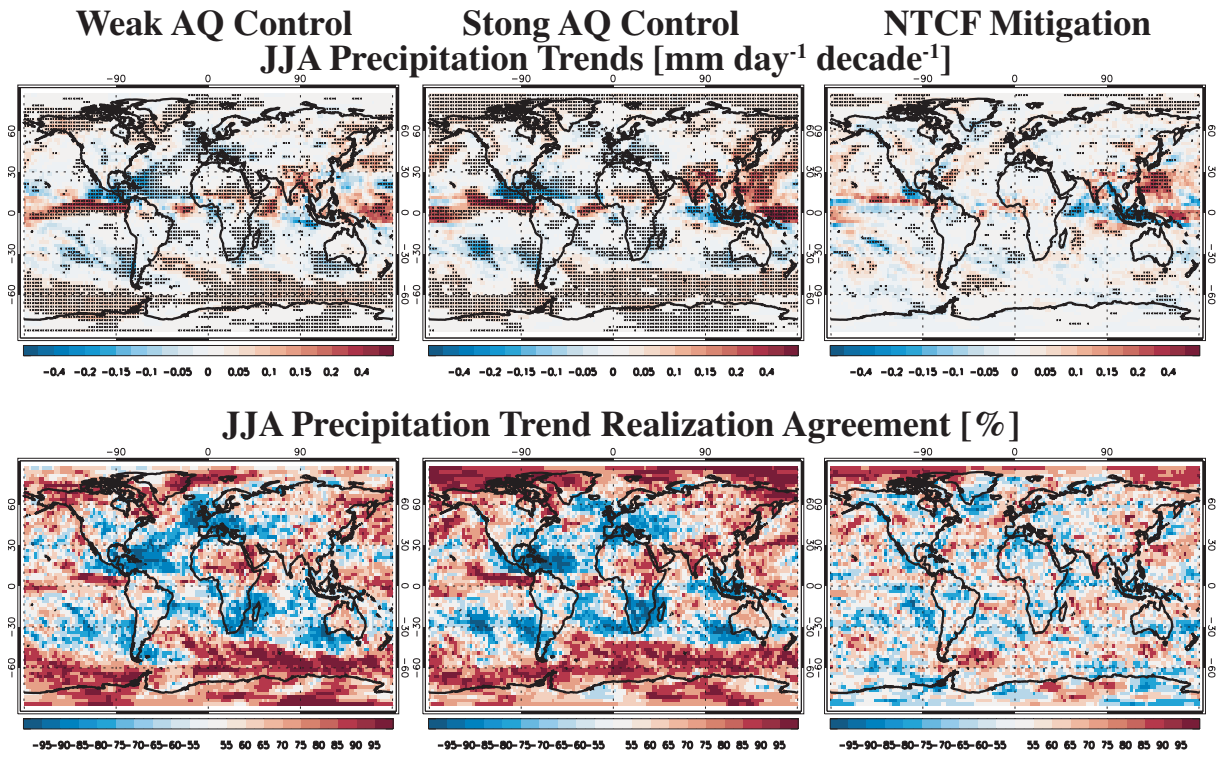

SUPPLEMENTARY FIGURE 5 2015-2055 June-July-August (JJA) mean precipitation trends and model trend realization agreement. Precipitation (top panels) trends [mm day<sup>-1</sup> decade<sup>-1</sup>] and (bottom panels) model trend realization agreement [%] for (left panels) weak air quality control (SSP3-7.0); (middle panels) strong air quality control (SSP3-7.0-lowNTCF) and (right panels) NTCF mitigation (SSP3-7.0-lowNTCF-SSP3-7.0). Stippling denotes trend significance at the 95% confidence level based on a standard *t*-test. Trend realization agreement represents the percentage of models that agree on the sign of the trend.

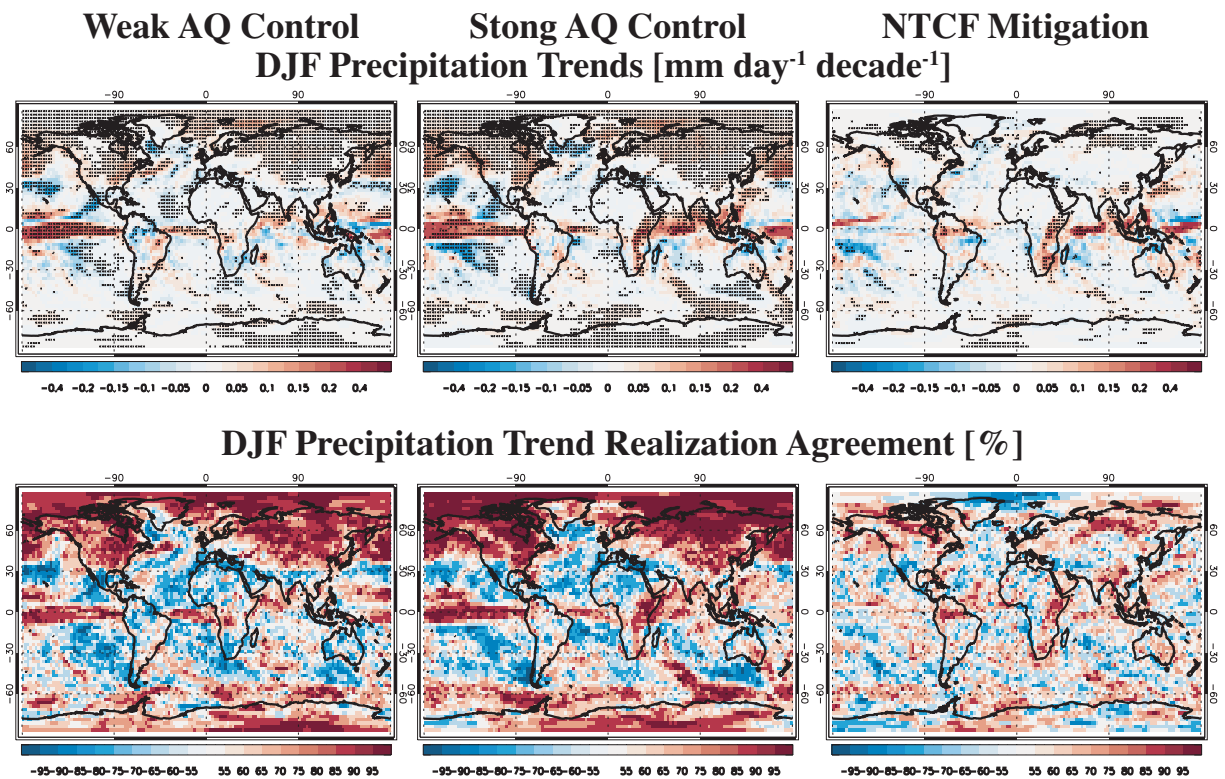

SUPPLEMENTARY FIGURE 6 2015-2055 December-January-February (DJF) mean precipitation trends and model trend realization agreement. Precipitation (top panels) trends [mm day<sup>-1</sup> decade<sup>-1</sup>] and (bottom panels) model trend realization agreement [%] for (left panels) weak air quality control (SSP3-7.0); (middle panels) strong air quality control (SSP3-7.0-lowNTCF) and (right panels) NTCF mitigation (SSP3-7.0-lowNTCF-SSP3-7.0). Stippling denotes trend significance at the 95% confidence level based on a standard *t*-test. Trend realization agreement represents the percentage of models that agree on the sign of the trend.
